# Supplementary material for: Do mobile phone-based reminders and conditional financial transfers improve the timeliness of childhood vaccinations in Tanzania? Study protocol for a quasi-randomized controlled trial
Source: PubMed Central journal article supplement (PMC6611039; doi:10.1186/s13063-019-3430-4), 2019-07-04
Supplement: 13063_2019_3430_MOESM1_ESM.pdf [file 13063_2019_3430_MOESM1_ESM.pdf]

**Table S1. Content of SMS reminders**

|                                                                                                                                | Recipient phone: Mother or Father                                                                                                                                                                                                           |                                                                                                                                                                                              | Recipient phone: Anyone else                                                                                                                                                                                  |                                                                                                                                                                                          |
|--------------------------------------------------------------------------------------------------------------------------------|---------------------------------------------------------------------------------------------------------------------------------------------------------------------------------------------------------------------------------------------|----------------------------------------------------------------------------------------------------------------------------------------------------------------------------------------------|---------------------------------------------------------------------------------------------------------------------------------------------------------------------------------------------------------------|------------------------------------------------------------------------------------------------------------------------------------------------------------------------------------------|
| Description                                                                                                                    | English                                                                                                                                                                                                                                     | Kiswahili                                                                                                                                                                                    | English                                                                                                                                                                                                       | Kiswahili                                                                                                                                                                                |
| Reminder, 1 week and 1 day prior to a scheduled vaccination                                                                    | Your child is due for vaccination on [DUE_DATE]. If s/he already got vaccinated dial [USSD or CARRIER_SPECIFIC PHONE].                                                                                                                      | Mtoto wako anatakiwa kupata chanjo tarehe [DUE_DATE]. Akishapata chanjo piga [USSD or CARRIER_SPECIFIC PHONE].                                                                               | Please remind [MOTHER_NAME] that her child is due for vaccination on [DUE_DATE]. If s/he already got vaccinated dial [USSD or CARRIER_SPECIFIC PHONE].                                                        | Tafadhali mkumbushe [MOTHER_NAME] kuwa mtoto wake anatakiwa kuchanjwa tarehe [DUE_DATE]. Akishapata chanjo piga [USSD or CARRIER_SPECIFIC PHONE].                                        |
| Follow-up reminder, 14 days after a scheduled vaccination (if no vaccination report has been received)                         | Did your child receive the vaccination that was scheduled for [DUE_DATE]? If s/he did not get vaccinated, take him/her before [DUE_DATE+28 DAYS]. If s/he got vaccinated dial [USSD or CARRIER_SPECIFIC PHONE].                             | Je mtoto wako amepata chanjo aliyopangiwa tarehe [DUE_DATE]? Kama hajachanjwa, mpeleke kabla ya tarehe [DUE_DATE+28 DAYS]. Akichanjwa piga [USSD or CARRIER_SPECIFIC PHONE].                 | Did [MOTHER_NAME] take her child to get vaccinated on [DUE_DATE]? If not, she should take him/her before [DUE_DATE+28 DAYS]. If s/he got vaccinated dial [USSD or CARRIER_SPECIFIC PHONE].                    | Je [MOTHER_NAME] amempeleka mtoto kuchanjwa tarehe [DUE_DATE]? Kama sio, ampeleke kabla ya tarehe [DUE_DATE+28 DAYS]. Akichanjwa piga [USSD or CARRIER_SPECIFIC PHONE].                  |
| Reminder with full incentive, 1 week and 1 day prior to a scheduled vaccination                                                | Your child is due for vaccination on [DUE_DATE]. If s/he receives the vaccination on time you will receive SH2000. If s/he already got vaccinated dial [USSD or CARRIER_SPECIFIC PHONE].                                                    | Mtoto wako anatakiwa kupata chanjo tarehe [DUE_DATE]. Akipata chanjo kwa wakati utapokea Sh2000. Akishapata chanjo piga [USSD or CARRIER_SPECIFIC PHONE].                                    | Please remind [MOTHER_NAME] that her child is due for vaccination on [DUE_DATE]. She will receive Sh2000 if s/he is vaccinated on time. If s/he already got vaccinated dial [USSD or CARRIER_SPECIFIC PHONE]. | Tafadhali mkumbushe [MOTHER_NAME] kuwa mtoto wake anatakiwa kuchanjwa tarehe [DUE_DATE]. Atapokea Sh2000 akichanjwa kwa wakati. Akishapata chanjo piga [USSD or CARRIER_SPECIFIC PHONE]. |
| Follow-up reminder with half the incentive, 14 days after a scheduled vaccination (if no vaccination report has been received) | Did your child receive the vaccination that was scheduled for [DUE_DATE]? If s/he did not get vaccinated, take him/her before [DUE_DATE+28 DAYS] and you will receive SH1000. If s/he got vaccinated dial [USSD or CARRIER_SPECIFIC PHONE]. | Je mtoto wako amepata chanjo aliyopangiwa tarehe [DUE_DATE]? Kama hajachanjwa, mpeleke kabla ya tarehe [DUE_DATE+28 DAYS] utapokea Sh1000. Akichanjwa piga [USSD or CARRIER_SPECIFIC PHONE]. | Did [MOTHER_NAME] take her child to get vaccinated on [DUE_DATE]? If not, she should take him/her before [DUE_DATE+28 DAYS] to receive Sh1000. If s/he got vaccinated dial [USSD or CARRIER_SPECIFIC PHONE].  | Je [MOTHER_NAME] amempeleka mtoto kuchanjwa tarehe [DUE_DATE]? Kama sio, ampeleke kabla ya tarehe [DUE_DATE+28 DAYS] atapokea Sh1000. Akichanjwa piga [USSD or CARRIER_SPECIFIC PHONE].  |
