# Supplementary material for: Do mobile phone-based reminders and conditional financial transfers improve the timeliness of childhood vaccinations in Tanzania? Study protocol for a quasi-randomized controlled trial
Source: PubMed Central journal article supplement (PMC6611039; doi:10.1186/s13063-019-3430-4), 2019-07-04
Supplement: 13063_2019_3430_MOESM2_ESM.pdf [file 13063_2019_3430_MOESM2_ESM.pdf]

**Table S2: WHO Trial Registration Data Set**

| <b>Data category</b>                          | <b>Information</b>                                                                                                                                                                                                                                                                                                 |
|-----------------------------------------------|--------------------------------------------------------------------------------------------------------------------------------------------------------------------------------------------------------------------------------------------------------------------------------------------------------------------|
| Primary registry and trial identifying number | ClinicalTrials.gov<br>NCT03252288                                                                                                                                                                                                                                                                                  |
| Date of registration in primary registry      | August 17, 2017                                                                                                                                                                                                                                                                                                    |
| Secondary identifying numbers                 | N/A                                                                                                                                                                                                                                                                                                                |
| Source(s) of monetary or material support     | John E. Fogarty International Center (FIC); Duke Global Health Institute                                                                                                                                                                                                                                           |
| Primary sponsor                               | Duke University, USA                                                                                                                                                                                                                                                                                               |
| Secondary sponsor(s)                          | University of South Carolina, USA, National Institute for Medical Research, Tanzania                                                                                                                                                                                                                               |
| Contact for public queries                    | Lavanya Vasudevan, PhD<br>Ph: 9196131423<br><a href="mailto:lavanya.vasudevan@duke.edu">lavanya.vasudevan@duke.edu</a><br>Jan Ostermann, PhD<br>Ph: 8037778747<br><a href="mailto:jano@mailbox.sc.edu">jano@mailbox.sc.edu</a>                                                                                     |
| Contact for scientific queries                | Lavanya Vasudevan, PhD<br>Ph: 9196131423<br><a href="mailto:lavanya.vasudevan@duke.edu">lavanya.vasudevan@duke.edu</a><br>Jan Ostermann, PhD<br>Ph: 8037778747<br><a href="mailto:jano@mailbox.sc.edu">jano@mailbox.sc.edu</a>                                                                                     |
| Public title                                  | mHealth-Assisted Conditional Cash Transfers to Improve Timeliness of Vaccinations (MINT)                                                                                                                                                                                                                           |
| Scientific title                              | mHealth-Assisted Conditional Cash Transfers to Improve Timeliness of Vaccinations (MINT)                                                                                                                                                                                                                           |
| Countries of recruitment                      | Tanzania                                                                                                                                                                                                                                                                                                           |
| Health conditions or problems studied         | Childhood vaccinations                                                                                                                                                                                                                                                                                             |
| Intervention(s)                               | Behavioral: Reminders<br>Behavioral: Conditional financial transfers                                                                                                                                                                                                                                               |
| Key inclusion and exclusion criteria          | Ages Eligible for Study: 16 Years and older<br>Sexes Eligible for Study: Female<br>Accepts Healthy Volunteers: No<br>Inclusion criteria: Pregnant, last trimester, access to mobile phone<br>Exclusion criteria: Cognitive impairment, unwillingness to receive study communication and reminders via mobile phone |
| Study type                                    | Interventional (Clinical Trial)                                                                                                                                                                                                                                                                                    |
| Date of first enrolment                       | August 15, 2017                                                                                                                                                                                                                                                                                                    |
| Target sample size                            | 600                                                                                                                                                                                                                                                                                                                |
| Recruitment status                            | Completed                                                                                                                                                                                                                                                                                                          |
| Primary outcome(s)                            | 1. Timely vaccination visits<br>[Time Frame: Up to 6 months after birth]<br>Number of vaccination visits within 4 weeks of scheduled visit dates                                                                                                                                                                   |
| Key secondary outcomes                        | 1. Number of vaccinations received<br>[ Time Frame: Up to 6 months after birth ]<br>Number of vaccinations received<br>2. Number of timely vaccinations received<br>[ Time Frame: Up to 6 months after birth ]<br>Number of vaccinations received within 4 weeks of scheduled vaccination dates                    |
